# Supplementary material for: The Songbird as a Percussionist: Syntactic Rules for Non-Vocal Sound and Song Production in Java Sparrows
Source: PLOS journal article supplement (doi:10.1371/journal.pone.0124876), 2015-05-20
Supplement: S5 (10.1371/journal.pone.0124876.s005) [file journal.pone.0124876.s005]

**Table S1.** The effects of preceding and following note types on click probability in note sequences of the songs of each subject. **(A)** To test if the male Java sparrow produced bill-clicks before or after particular note types, we fitted the data with logistic regression models, in which the dependent variable was whether or not each transition involved clicks and the explanatory variables were preceding and following note types of the transition (referred to as pre and post note types). The statistical significance of the effects of pre- and post-note types were derived from a log-likelihood ratio test comparing the full model (pre and post) with two models that dropped one of the terms (either pre or post) from the full model. **(B)** We also applied the above analyses to the latter half of note sequences of songs, given the possible confounding effect of note orders (i.e., bill clicks and particular notes tended to be produced in earlier part of songs). In these models, the dependent variable was whether or not each transition involved clicks and the explanatory variables were preceding and following note types of the transition, and note orders. Due to the fact that some birds produced bill clicks only in earlier parts of songs, subject birds were limited compared with (A). **(C)** Comparisons of bill-click syntax between the first and last halves are shown for the songs analyzed in (B)

(A) Whole note sequences of songs

| Song      |         | Note       | Analysed | Pre note type |              | Post note type     |              |                    |
|-----------|---------|------------|----------|---------------|--------------|--------------------|--------------|--------------------|
| family    | ID      | repertoire | songs    | $\chi^2$      | p            | $\chi^2$           | p            |                    |
| A         | js0002  | Father     | 5        | n = 20        | <b>74.40</b> | <b>&lt; 0.0001</b> | <b>21.93</b> | <b>&lt; 0.0001</b> |
| A         | js0048  | Foster son | 5        | n = 20        | <b>22.29</b> | <b>&lt; 0.0001</b> | 3.96         | 0.161              |
| B         | js0003  | Father     | 7        | n = 20        | <b>68.04</b> | <b>&lt; 0.0001</b> | <b>25.88</b> | <b>&lt; 0.0001</b> |
| B         | js0042  | Son        | 7        | n = 20        | <b>25.26</b> | <b>&lt; 0.0001</b> | 3.47         | 0.435              |
| B         | js0044  | Foster son | 7        | n = 20        | <b>9.03</b>  | <b>0.012</b>       | <b>11.26</b> | <b>0.002</b>       |
| D         | js0016  | Father     | 6        | n = 16        | <b>17.65</b> | <b>&lt; 0.0001</b> | <b>33.09</b> | <b>&lt; 0.0001</b> |
| D         | js0069  | Son        | 6        | n = 20        | <b>20.72</b> | <b>&lt; 0.0001</b> | <b>78.92</b> | <b>&lt; 0.0001</b> |
| E         | js0023  | Father     | 6        | n = 20        | 5.13         | 0.114              | <b>18.14</b> | <b>&lt; 0.0001</b> |
| E         | js0051  | Foster son | 6        | n = 18        | <b>40.66</b> | <b>&lt; 0.0001</b> | <b>34.13</b> | <b>&lt; 0.0001</b> |
| G         | js0037  | Father     | 5        | n = 18        | <b>25.40</b> | <b>&lt; 0.0001</b> | <b>14.32</b> | <b>&lt; 0.0001</b> |
| G         | js0052  | Son        | 5        | n = 20        | <b>21.60</b> | <b>&lt; 0.0001</b> | <b>11.55</b> | <b>&lt; 0.0004</b> |
| B2        | js0041  | Father     | 6        | n = 16        | <b>27.67</b> | <b>&lt; 0.0001</b> | <b>7.44</b>  | <b>0.021</b>       |
| B2        | js0087  | Son        | 6        | n = 20        | <b>47.33</b> | <b>&lt; 0.0001</b> | <b>14.60</b> | <b>&lt; 0.0001</b> |
| Untutored | prpl045 |            | 11       | n = 20        | <b>24.32</b> | <b>&lt; 0.0001</b> | <b>21.56</b> | <b>&lt; 0.0001</b> |
| Untutored | Ltgr142 |            | 7        | n = 18        | <b>9.00</b>  | <b>0.012</b>       | <b>26.60</b> | <b>&lt; 0.0001</b> |
| Untutored | Ltgr073 |            | 5        | n = 20        | 0.19         | 0.984              | <b>70.68</b> | <b>&lt; 0.0001</b> |
| Untutored | Ltgr031 |            | 10       | n = 20        | <b>44.92</b> | <b>&lt; 0.0001</b> | <b>51.34</b> | <b>&lt; 0.0001</b> |
| Untutored | Ltgr047 |            | 8        | n = 20        | <b>23.77</b> | <b>&lt; 0.0001</b> | <b>11.90</b> | <b>&lt; 0.003</b>  |

(B) Latter half note sequences of songs

| Song      |         |            | Pre note type |                    | Post note type |                    | Order       |              |
|-----------|---------|------------|---------------|--------------------|----------------|--------------------|-------------|--------------|
| family    | ID      |            | $\chi^2$      | p                  | $\chi^2$       | p                  | $\chi^2$    | p            |
| A         | js0002  | Father     | <b>39.88</b>  | <b>&lt; 0.0001</b> | <b>9.75</b>    | <b>0.0006</b>      | 1.23        | 0.134        |
| B         | js0044  | Foster son | <b>10.45</b>  | <b>0.002</b>       | <b>8.46</b>    | <b>0.018</b>       | 0.33        | 0.417        |
| E         | js0051  | Foster son | <b>8.73</b>   | <b>0.002</b>       | <b>13.29</b>   | <b>&lt; 0.0001</b> | 0.22        | 0.510        |
| B2        | js0087  | Son        | <b>18.50</b>  | <b>&lt; 0.0001</b> | <b>9.78</b>    | <b>0.003</b>       | 1.75        | 0.062        |
| Untutored | prpl045 |            | <b>13.45</b>  | <b>0.003</b>       | 5.52           | 0.440              | 0.81        | 0.203        |
| Untutored | Ltgr142 |            | <b>23.92</b>  | <b>&lt; 0.0001</b> | <b>18.33</b>   | <b>&lt; 0.0001</b> | 1.61        | 0.073        |
| Untutored | Ltgr073 |            | 0.29          | 0.900              | <b>26.33</b>   | <b>&lt; 0.0001</b> | <b>4.39</b> | <b>0.036</b> |
| Untutored | Ltgr031 |            | <b>23.59</b>  | <b>&lt; 0.0001</b> | <b>9.38</b>    | <b>0.016</b>       | <b>7.29</b> | <b>0.007</b> |

(C) Comparisons of bill-click syntax between the first and last halves of the songs analyzed in (B)

| JS0002         |            |       |    |             |       |    |
|----------------|------------|-------|----|-------------|-------|----|
| Pre note type  | First half |       |    | Second half |       |    |
|                | n          | click |    | n           | click |    |
| start          | 50%        | 20    | 10 | -           | -     | -  |
| a              | 46%        | 83    | 38 | 47%         | 100   | 47 |
| b              | 0%         | 28    | 0  | 2%          | 44    | 1  |
| c              | 8%         | 105   | 8  | 1%          | 87    | 1  |
| d              | 0%         | 4     | 0  | 0%          | 11    | 0  |
| e              | 93%        | 14    | 13 | -           | 0     | 0  |
| Post note type |            |       |    |             |       |    |
| a              | 47%        | 92    | 43 | 32%         | 91    | 29 |
| b              | 3%         | 33    | 1  | 3%          | 39    | 1  |
| c              | 15%        | 110   | 17 | 20%         | 82    | 16 |
| d              | 0%         | 5     | 0  | 0%          | 10    | 0  |
| e              | 57%        | 14    | 8  | -           | 0     | 0  |
| end            | -          | -     | -  | 15%         | 20    | 3  |

  

| JS0044         |            |       |    |             |       |    |
|----------------|------------|-------|----|-------------|-------|----|
| Pre note type  | First half |       |    | Second half |       |    |
|                | n          | click |    | n           | click |    |
| start          | 10%        | 20    | 2  | -           | -     | -  |
| a              | 17%        | 111   | 19 | 9%          | 35    | 3  |
| b              | 6%         | 109   | 6  | 2%          | 81    | 2  |
| c              | 10%        | 82    | 8  | 0%          | 23    | 0  |
| d              | 0%         | 6     | 0  | 17%         | 29    | 5  |
| e              | 7%         | 15    | 1  | 18%         | 50    | 9  |
| f              | 7%         | 15    | 1  | 3%          | 92    | 3  |
| g              | 17%        | 12    | 2  | 19%         | 48    | 9  |
| post note type |            |       |    |             |       |    |
| a              | 19%        | 115   | 22 | 16%         | 31    | 5  |
| b              | 8%         | 116   | 9  | 4%          | 74    | 3  |
| c              | 6%         | 86    | 5  | 0%          | 19    | 0  |
| d              | 0%         | 10    | 0  | 0%          | 25    | 0  |
| e              | 7%         | 15    | 1  | 8%          | 50    | 4  |
| f              | 7%         | 15    | 1  | 13%         | 92    | 12 |
| g              | 8%         | 13    | 1  | 15%         | 47    | 7  |
| end            | -          | -     | -  | 0%          | 20    | 0  |

  

| JS0051         |            |       |    |             |       |   |
|----------------|------------|-------|----|-------------|-------|---|
| Pre note type  | First half |       |    | Second half |       |   |
|                | n          | click |    | n           | click |   |
| start          | 0%         | 18    | 0  | -           | -     | - |
| a              | 42%        | 74    | 31 | -           | 0     | 0 |
| b              | 22%        | 67    | 15 | 7%          | 55    | 4 |
| c              | 1%         | 184   | 1  | 4%          | 190   | 8 |
| d              | 0%         | 6     | 0  | 0%          | 38    | 0 |
| e              | -          | 0     | 0  | 0%          | 21    | 0 |
| f              | -          | 0     | 0  | 5%          | 37    | 2 |
| post note type |            |       |    |             |       |   |
| a              | 42%        | 74    | 31 | -           | 0     | 0 |
| b              | 12%        | 67    | 8  | 4%          | 55    | 2 |
| c              | 4%         | 198   | 7  | 2%          | 176   | 4 |
| d              | 0%         | 8     | 0  | 6%          | 36    | 2 |
| e              | 50%        | 2     | 1  | 26%         | 19    | 5 |
| f              | -          | 0     | 0  | 3%          | 37    | 1 |
| end            | -          | -     | -  | 0%          | 18    | 0 |

| JS0087         |            |       |    |             |       |    |
|----------------|------------|-------|----|-------------|-------|----|
| Pre note type  | First half |       |    | Second half |       |    |
|                | n          | click |    | n           | click |    |
| start          | 65%        | 20    | 13 | -           | -     | -  |
| a              | 25%        | 75    | 19 | 16%         | 62    | 10 |
| b              | 0%         | 77    | 0  | 2%          | 58    | 1  |
| c              | 52%        | 52    | 27 | 56%         | 9     | 5  |
| d              | 60%        | 20    | 12 | 23%         | 13    | 3  |
| f              | 0%         | 37    | 0  | 0%          | 86    | 0  |
| g              | 0%         | 6     | 0  | 0%          | 60    | 0  |
| Post note type |            |       |    |             |       |    |
| a              | 35%        | 82    | 29 | 11%         | 55    | 6  |
| b              | 51%        | 81    | 41 | 13%         | 54    | 7  |
| c              | 2%         | 53    | 1  | 0%          | 8     | 0  |
| d              | 0%         | 20    | 0  | 0%          | 13    | 0  |
| f              | 0%         | 42    | 0  | 0%          | 81    | 0  |
| g              | 0%         | 9     | 0  | 2%          | 57    | 1  |
| end            | -          | -     | -  | 25%         | 20    | 5  |

  

| prpl045        |            |       |    |             |       |    |
|----------------|------------|-------|----|-------------|-------|----|
| Pre note type  | First half |       |    | Second half |       |    |
|                | n          | click |    | n           | click |    |
| start          | 15%        | 20    | 3  | -           | -     | -  |
| a              | 0%         | 7     | 0  | 0%          | 2     | 0  |
| b              | 1%         | 77    | 1  | 0%          | 4     | 0  |
| c              | 18%        | 74    | 13 | 0%          | 3     | 0  |
| d              | 0%         | 4     | 0  | 0%          | 13    | 0  |
| e              | 0%         | 11    | 0  | 4%          | 54    | 2  |
| f              | 0%         | 35    | 0  | 2%          | 47    | 1  |
| g              | 0%         | 4     | 0  | 0%          | 12    | 0  |
| h              | 60%        | 5     | 3  | 53%         | 36    | 19 |
| i              | 50%        | 12    | 6  | 10%         | 51    | 5  |
| j              | 54%        | 24    | 13 | 38%         | 24    | 9  |
| k              | -          | 0     | 0  | 0%          | 18    | 0  |
| Post note type |            |       |    |             |       |    |
| a              | 29%        | 7     | 2  | 0%          | 2     | 0  |
| b              | 5%         | 77    | 4  | 0%          | 4     | 0  |
| c              | 11%        | 75    | 8  | 0%          | 2     | 0  |
| d              | 0%         | 4     | 0  | 0%          | 13    | 0  |
| e              | 0%         | 15    | 0  | 2%          | 50    | 1  |
| f              | 0%         | 44    | 0  | 3%          | 38    | 1  |
| g              | 0%         | 5     | 0  | 0%          | 11    | 0  |
| h              | 40%        | 5     | 2  | 14%         | 36    | 5  |
| i              | 33%        | 15    | 5  | 29%         | 48    | 14 |
| j              | 69%        | 26    | 18 | 50%         | 22    | 11 |
| k              | -          | 0     | 0  | 0%          | 18    | 0  |
| end            | -          | -     | -  | 20%         | 20    | 4  |

| Ltgr142        |            |       |    |             |       |    |
|----------------|------------|-------|----|-------------|-------|----|
| Pre note type  | First half |       |    | Second half |       |    |
|                | n          | click |    | n           | click |    |
| start          | 33%        | 18    | 6  | -           | -     | -  |
| a              | 20%        | 5     | 1  | 0%          | 4     | 0  |
| b              | 50%        | 44    | 22 | 64%         | 56    | 36 |
| c              | 20%        | 15    | 3  | 19%         | 37    | 7  |
| e              | 100%       | 1     | 1  | 50%         | 8     | 4  |
| f              | 89%        | 9     | 8  | 52%         | 23    | 12 |
| g              | 8%         | 13    | 1  | -           | 0     | 0  |
| h              | 19%        | 58    | 11 | 4%          | 23    | 1  |
| Post note type |            |       |    |             |       |    |
| a              | 33%        | 6     | 2  | 0%          | 3     | 0  |
| b              | 52%        | 50    | 26 | 56%         | 50    | 28 |
| c              | 74%        | 19    | 14 | 61%         | 33    | 20 |
| e              | 100%       | 2     | 2  | 57%         | 7     | 4  |
| f              | 0%         | 9     | 0  | 0%          | 23    | 0  |
| g              | 0%         | 13    | 0  | -           | 0     | 0  |
| h              | 14%        | 64    | 9  | 6%          | 17    | 1  |
| end            | -          | -     | -  | 39%         | 18    | 7  |

  

| Ltgr073        |            |       |    |             |       |    |
|----------------|------------|-------|----|-------------|-------|----|
| Pre note type  | First half |       |    | Second half |       |    |
|                | n          | click |    | n           | click |    |
| start          | 95%        | 20    | 19 | -           | -     | -  |
| a              | 0%         | 62    | 0  | 0%          | 33    | 0  |
| b              | 40%        | 63    | 25 | 36%         | 53    | 19 |
| c              | 93%        | 28    | 26 | 83%         | 36    | 30 |
| d              | 0%         | 6     | 0  | 0%          | 15    | 0  |
| e              | 67%        | 3     | 2  | 80%         | 35    | 28 |
| Post note type |            |       |    |             |       |    |
| a              | 94%        | 65    | 61 | 93%         | 30    | 28 |
| b              | 0%         | 68    | 0  | 0%          | 48    | 0  |
| c              | 0%         | 36    | 0  | 0%          | 28    | 0  |
| d              | 89%        | 9     | 8  | 100%        | 12    | 12 |
| e              | 75%        | 4     | 3  | 88%         | 34    | 30 |
| end            | -          | -     | -  | 35%         | 20    | 7  |

  

| Ltgr031        |            |       |    |             |       |    |
|----------------|------------|-------|----|-------------|-------|----|
| Pre note type  | First half |       |    | Second half |       |    |
|                | n          | click |    | n           | click |    |
| start          | 70%        | 20    | 14 | -           | -     | -  |
| a              | 47%        | 47    | 22 | 28%         | 46    | 13 |
| b              | 83%        | 42    | 35 | -           | 0     | 0  |
| c              | 0%         | 61    | 0  | 0%          | 14    | 0  |
| d              | 28%        | 58    | 16 | 21%         | 43    | 9  |
| e              | 21%        | 29    | 6  | 0%          | 13    | 0  |
| f              | 47%        | 15    | 7  | 15%         | 41    | 6  |
| g              | 0%         | 12    | 0  | 0%          | 26    | 0  |
| h              | 43%        | 7     | 3  | 0%          | 14    | 0  |
| i              | -          | 0     | 0  | 0%          | 26    | 0  |
| j              | 0%         | 1     | 0  | 0%          | 61    | 0  |
| Post note type |            |       |    |             |       |    |
| a              | 31%        | 48    | 15 | 13%         | 45    | 6  |
| b              | 100%       | 42    | 42 | -           | 0     | 0  |
| c              | 47%        | 62    | 29 | 0%          | 13    | 0  |
| d              | 0%         | 61    | 0  | 0%          | 40    | 0  |
| e              | 10%        | 29    | 3  | 8%          | 13    | 1  |
| f              | 32%        | 19    | 6  | 8%          | 37    | 3  |
| g              | 42%        | 19    | 8  | 0%          | 19    | 0  |
| h              | 0%         | 10    | 0  | 0%          | 11    | 0  |
| i              | -          | 0     | 0  | 4%          | 26    | 1  |
| j              | 0%         | 2     | 0  | 13%         | 60    | 8  |
| end            | -          | -     | -  | 45%         | 20    | 9  |
